# Supplementary material for: UHV deposition and characterization of a mononuclear iron(III) β-diketonate complex on Au(111)
Source: publisher site journal article supplement (doi:10.3762/bjnano.5.223), 2014-11-18
Supplement: Additional file 1 [file 2190-4286-5-223-S1.pdf]

**Supporting Information**  
**for**  
**UHV deposition and characterization of a mononuclear iron(III)  $\beta$ -diketonate complex on Au(111)**

Irene Cimatti<sup>1</sup>, Silviya Ninova<sup>1</sup>, Valeria Lanzilotto<sup>1</sup>, Luigi Malavolti<sup>1</sup>, Luca Rigamonti<sup>2</sup>, Brunetto Cortigiani<sup>1</sup>, Matteo Mannini<sup>1</sup>, Elena Magnano<sup>3</sup>, Federica Bondino<sup>3</sup>, Federico Totti<sup>1</sup>, Andrea Cornia<sup>2</sup> and Roberta Sessoli\*<sup>1</sup>

Address: <sup>1</sup>Laboratory of Molecular Magnetism, Department of Chemistry Ugo Schiff, University of Florence & INSTM RU of Florence, Via della Lastruccia 3, 50019 Sesto Fiorentino, Italy,

<sup>2</sup>Department of Chemical and Geological Sciences, University of Modena and Reggio Emilia & INSTM RU of Modena and Reggio Emilia, Via G. Campi 183, 41125 Modena, Italy, and <sup>3</sup>CNR-IOM, Laboratorio TASC, Basovizza SS-14, Km 163.5, 34149 Trieste, Italy

Email: Roberta Sessoli\* - roberta.sessoli@unifi.it

\* Corresponding author

**Additional STM images**

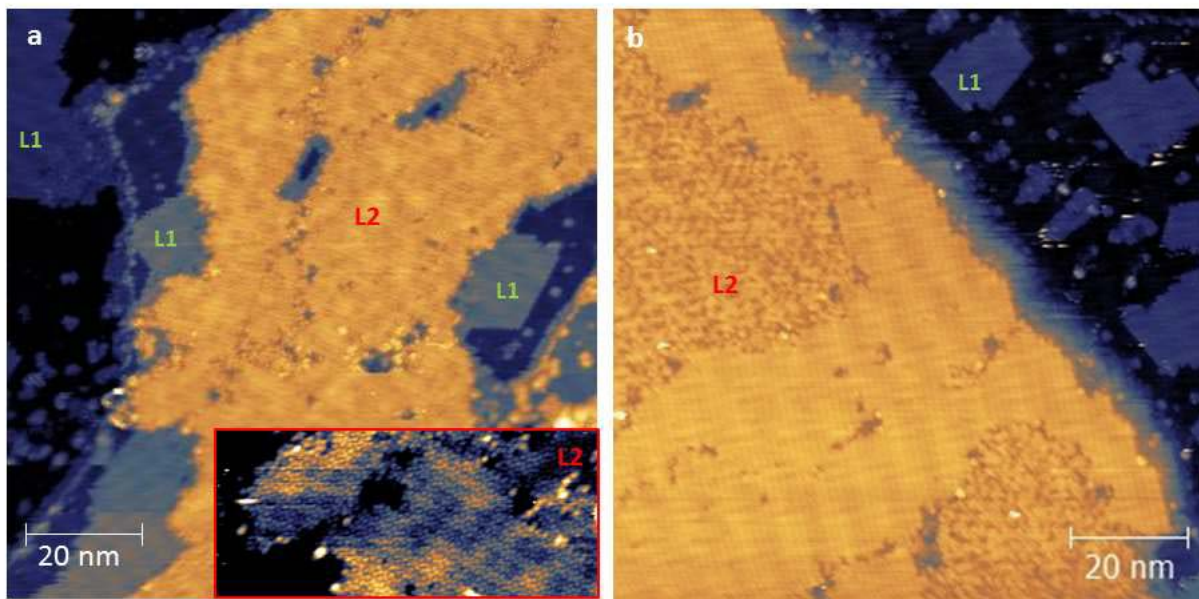

**Figure S1:** STM images of the Au(111) surface after exposure to  $\text{Fe}(\text{dpm})_3$  for  $t_1 = 30$  min (low rate). First and second layer are indicated as L1 and L2, respectively. (a) Size =  $100 \times 100 \text{ nm}^2$ , Bias =  $-2 \text{ V}$ ,  $I = 3 \text{ pA}$ . (Inset) Enlarged view of L2, Size =  $18 \times 41 \text{ nm}^2$ . (b) Size =  $100 \times 100 \text{ nm}^2$ , Bias =  $-2 \text{ V}$ ,  $I = 5 \text{ pA}$ . The height of L2 is  $0.27 \pm 0.04 \text{ nm}$ , therefore comparable to L1 ( $0.29 \pm 0.2 \text{ nm}$ ). Figure 1b shows a second layer characterized by ordered and disordered domains.
